# Supplementary material for: The metabolic responses to hepatitis B virus infection shed new light on pathogenesis and targets for treatment
Source: PubMed Central journal article supplement — Sci Rep. 2015 Feb 12;5:8421. doi: 10.1038/srep08421 (PMC4325332; doi:10.1038/srep08421), 2015-02-12
Supplement: srep08421-s1.pdf [file srep08421-s1.pdf]

**The metabolic responses to hepatitis B virus infection shed  
new light on pathogenesis and targets for treatment**

Hongde Li, Wandu Zhu, Leike Zhang, Hehua Lei, Xiangyu Wu, Lin Guo,  
Xinwen Chen, Yulan Wang, and Huiru Tang

# Inventory of Supplementary Information

## Supplementary Figures

**Figure S1.** Typical 600 MHz  $^1\text{H}$  NMR spectra of aqueous methanol extracts from cell (A) HepG2 and (B) HepG2.2.15, medium from (C) HepG2 and (D) HepG2.2.15. The  $\delta$  5.0-9.5 region was vertically expanded 4 times for spectra A and B; the  $\delta$  5.5-9.5 region was vertically expanded 8 times for spectra C and D. The full assignment of metabolites was given in Table S1.

**Figure S2.** The MS spectrum (A) and MS-MS spectrum (B) of NAGK.

**Figure S3.** HBV 1.3-fold length plasmid (pHBV1.3, GenBank accession No. U95551, ayw) was transfected into HepG2 cells by electroporation using the method recommended by Bio-Rad Laboratories ([www.bio-rad.com](http://www.bio-rad.com)). (A) UDP-*N*-acetyl glucosamine (UDP-GlcNAc) and UDP-*N*-acetyl galactosamine (UDP-GalNAc) are increased in HepG2 cells transfected pHBV1.3 compared with HepG2. (B) The levels of GSH decrease in pHBV1.3 compared with HepG2. (mean  $\pm$  s.d.,  $n = 10$ , *t*-test, \*\*\* $P < 0.001$ ).

## Supplementary Tables

**Table S1.** NMR data for the metabolites assignment.

**Table S2.** Coefficients of metabolites with significant difference between HepG2.2.15 cells and HepG2 cells.

**Table S3.** Comparative total fatty acid profiles in HepG2 cells and HepG2.2.15 cells.

**Table S4.** The quantitation details of the expression levels of enzymes based on MS analysis.

**Table S5.** List of the primers used for quantitative RT-PCR

## **Supplementary Methods**

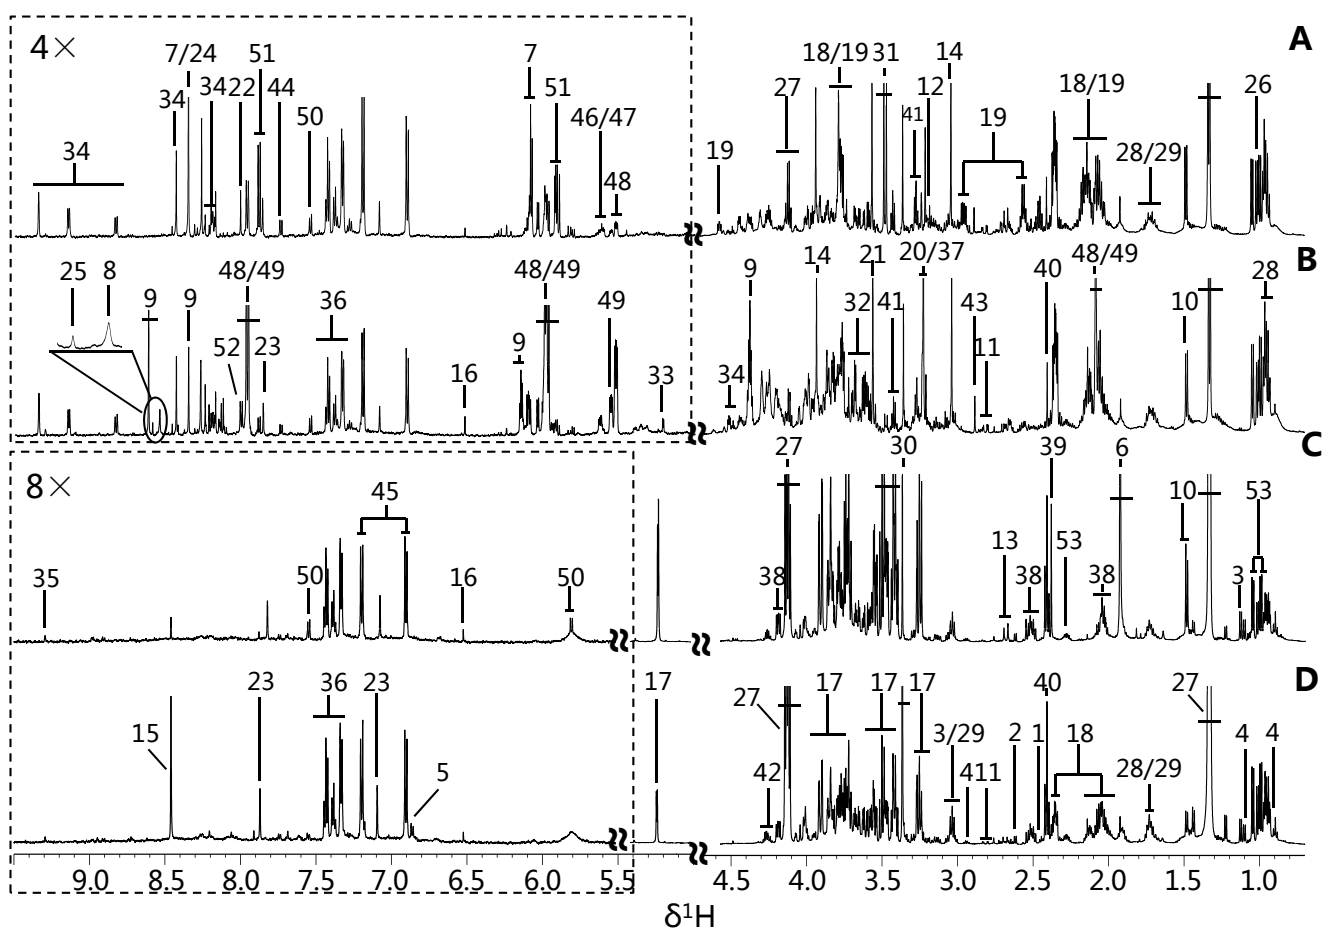

**Figure S1.** Typical 600 MHz  $^1\text{H}$  NMR spectra of aqueous methanol extracts from cell (A) HepG2 and (B) HepG2.2.15, medium from (C) HepG2 and (D) HepG2.2.15. The  $\delta$  5.0-9.5 region was vertically expanded 4 times for spectra A and B; the  $\delta$  5.5-9.5 region was vertically expanded 8 times for spectra C and D. The full assignment of metabolites was given in Table S1.

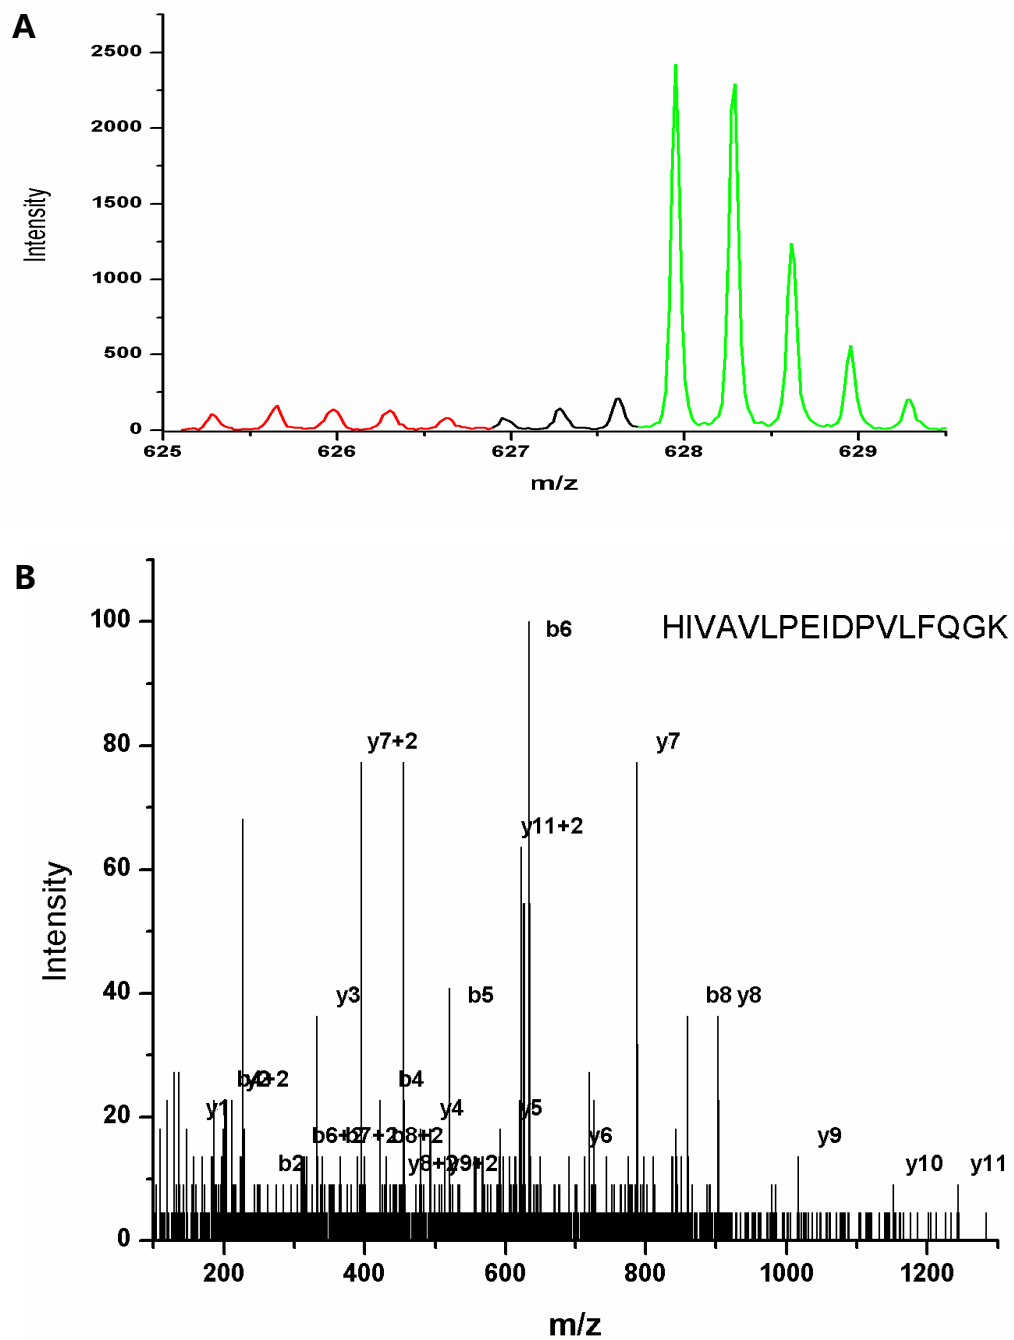

**Figure S2.** The MS spectrum (**A**) and MS-MS spectrum (**B**) of NAGK.

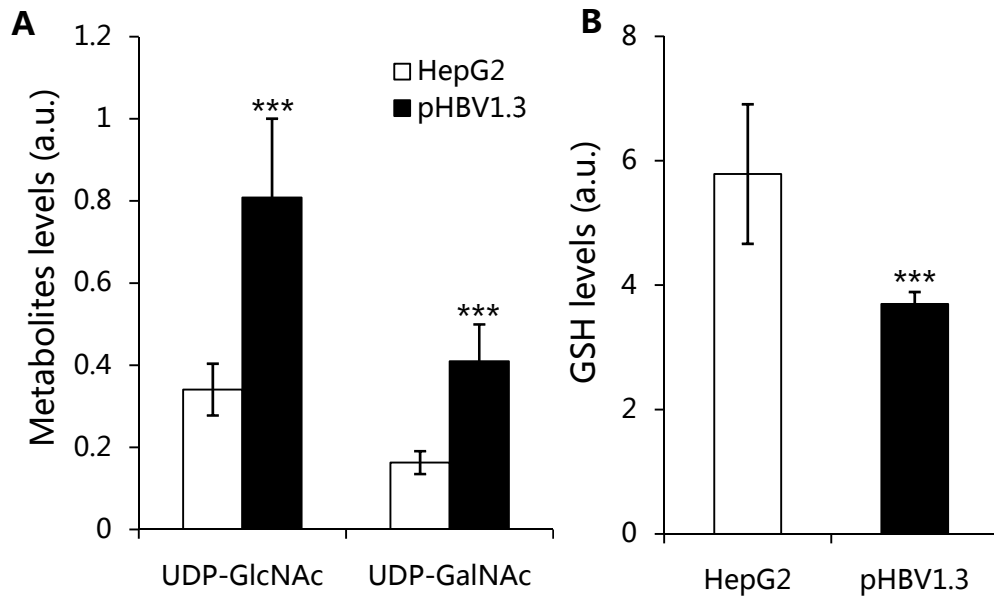

**Figure S3.** HBV 1.3-fold length plasmid (pHBV1.3, GenBank accession No. U95551, ayw) was transfected into HepG2 cells by electroporation using the method recommended by Bio-Rad Laboratories ([www.bio-rad.com](http://www.bio-rad.com)). **(A)** UDP-*N*-acetyl glucosamine (UDP-GlcNAc) and UDP-*N*-acetyl galactosamine (UDP-GalNAc) are increased in HepG2 cells transfected pHBV1.3 compared with HepG2. **(B)** The levels of GSH decrease in pHBV1.3 compared with HepG2. (mean  $\pm$  s.d.,  $n = 10$ , *t*-test, \*\*\* $P < 0.001$ ).

**Table S1.** NMR data for the metabolites assignment<sup>#</sup>

| Key | Metabolite                       | Assignment           | $\delta^1\text{H}$ (multiplicity <sup>a</sup> ) | $\delta^{13}\text{C}$ | Sample <sup>c</sup> |
|-----|----------------------------------|----------------------|-------------------------------------------------|-----------------------|---------------------|
| 1   | 2-Oxoglutarate (2-OG)            | $\gamma\text{CH}_2$  | 2.45(t)                                         | 33.7                  | M                   |
|     |                                  | $\beta\text{CH}_2$   | 3.01(t)                                         | 39                    |                     |
|     |                                  | 2-C                  |                                                 | 207.8                 |                     |
| 2   | 2-Oxoleucine (2-O-Leu)           | $\text{CH}_3$        | 0.94(d)                                         | 24.4                  | M                   |
|     |                                  | $\text{CH}_2$        | 2.618(d)                                        | 51.2                  |                     |
|     |                                  | CH                   | 2.12(m)                                         | 30.1                  |                     |
| 3   | 2-Oxoisovalerate (2-O-Val)       | $\text{CH}_3$        | 1.12(d)                                         | 19.4                  | M                   |
|     |                                  | CH                   | 3.02(m)                                         | 39.9                  |                     |
| 4   | 2-Oxoisoleucine (2-O-Ile)        | $\alpha\text{-CH}_3$ | 1.10(d)                                         | 16.7                  | M                   |
|     |                                  | $\gamma\text{-CH}_3$ | 0.89(t)                                         | 13.6                  |                     |
|     |                                  | CH                   | 2.94(m)                                         | 46.7                  |                     |
|     |                                  | $\text{CH}_2$        | 1.70/1.45(m)                                    | 27.4                  |                     |
| 5   | 4-Hydroxyphenylpyruvate (4HPPA)  | CH                   | 6.86(d)                                         | 118.9                 | M                   |
|     |                                  | CH                   | 7.18(d)                                         | 134.0                 |                     |
|     |                                  | $\text{CH}_2$        | 4.01(s)                                         | b                     |                     |
| 6   | Acetate                          | $\text{CH}_3$        | 1.92(s)                                         | 26.1                  | M                   |
|     |                                  | $\text{COO}^-$       |                                                 | 184.2                 |                     |
| 7   | Adenosine                        | CH-ring              | 8.34(s)                                         | 143.2                 | C                   |
|     |                                  | CH-ring              | 8.178(s)                                        | 155.4                 |                     |
|     |                                  | C1H-ribose           | 6.04(d)                                         | 89.5                  |                     |
|     |                                  | C2H-ribose           | 4.77(dd)                                        | 76.7                  |                     |
|     |                                  | C4H-ribose           | 4.28(dt)                                        | 88.4                  |                     |
|     |                                  | C3H-ribose           | 4.42(dd)                                        | 73                    |                     |
|     |                                  | C5H-ribose           | 3.85/3.9(dd)                                    | 64.1                  |                     |
| 8   | Adenosine 5'-diphosphate (ADP)   | CH-ring              | 8.54(s)                                         | 142.4                 | C                   |
|     |                                  | CH-ring              | 8.27(s)                                         | 155.9                 |                     |
|     |                                  | C1H-ribose           | 6.14(d)                                         | 89.9                  |                     |
|     |                                  | C2H-ribose           | 4.61(m)                                         | 72.8                  |                     |
|     |                                  | C3H-ribose           | 4.51(m)                                         | 73.1                  |                     |
|     |                                  | C4H-ribose           | 4.38(m)                                         | 86.8                  |                     |
|     |                                  | C5H-ribose           | 4.01(m)                                         | 66.2                  |                     |
| 9   | Adenosine 5'-monophosphate (AMP) | CH-ring              | 8.61(s)                                         | 143.3                 | C                   |
|     |                                  | CH-ring              | 8.27(s)                                         | 155.9                 |                     |
|     |                                  | C1H-ribose           | 6.14(d)                                         | 89.9                  |                     |
|     |                                  | C2H-ribose           | 4.77(m)                                         | 76.8                  |                     |
|     |                                  | C3H-ribose           | 4.51(m)                                         | 73.1                  |                     |
|     |                                  | C4H-ribose           | 4.37(m)                                         | 86.77                 |                     |
|     |                                  | C5H-ribose           | 4.01(m)                                         | 66.2                  |                     |
| 10  | Alanine (Ala)                    | $\alpha\text{-CH}$   | 3.78(q)                                         | 53.1                  | C, M                |

|    |                        |                           |           |       |      |
|----|------------------------|---------------------------|-----------|-------|------|
|    |                        | $\beta$ -CH <sub>3</sub>  | 1.48(d)   | 18.9  |      |
|    |                        | COO(H)                    |           | 178.5 |      |
| 11 | Aspartate (Asp)        | $\alpha$ -CH              | 3.90(m)   | 54.8  | C, M |
|    |                        | $\beta$ -CH               | 2.69(dd)  | 39.2  |      |
|    |                        | $\beta'$ -CH              | 2.81(dd)  |       |      |
|    |                        | $\gamma$ COO(H)           |           | 180.6 |      |
|    |                        | COO(H)                    |           | 177.4 |      |
| 12 | Choline                | $\alpha$ -CH <sub>2</sub> | 3.99(m)   | 70.0  | C    |
|    |                        | $\beta$ -CH <sub>2</sub>  | 3.56(m)   | 58.6  |      |
|    |                        | N-CH <sub>3</sub>         | 3.20(s)   | 56.6  |      |
| 13 | Citrate                | $\alpha$ , $\gamma$ -CH   | 2.68(dd)  | 47.1  | M    |
|    |                        | $\alpha'$ , $\gamma'$ -CH | 2.52(dd)  | 47.1  |      |
|    |                        | $\beta$ C                 |           | 77.4  |      |
|    |                        | C1,5                      |           | 180.6 |      |
|    |                        | C6                        |           | 182.5 |      |
| 14 | Creatine               | CH <sub>3</sub>           | 3.04(s)   | 39.6  | C    |
|    |                        | CH <sub>2</sub>           | 3.93(s)   | 56.5  |      |
|    |                        | N=C                       |           | 159.6 |      |
|    |                        | COO(H)                    |           | 177.3 |      |
| 15 | Formate                | H COO <sup>-</sup>        | 8.46(s)   | b     | C, M |
| 16 | Fumarate               | C2,3H                     | 6.52(s)   | 138.2 | C, M |
|    |                        | COO <sup>-</sup>          |           | b     |      |
| 17 | Glucose                | $\alpha$ C1H              | 5.24(d)   | 95.5  | M    |
|    |                        | $\beta$ C1H               | 4.65(d)   | 99.3  |      |
|    |                        |                           | 3.25(t)   | 77.5  |      |
|    |                        |                           | 3.39-3.55 |       |      |
|    |                        |                           | 3.69-3.93 |       |      |
| 18 | Glutamate (Glu)        | $\alpha$ -CH              | 3.76(m)   | 57.3  | C, M |
|    |                        | $\beta$ -CH <sub>2</sub>  | 2.08(m)   | 29.8  |      |
|    |                        | $\gamma$ -CH <sub>2</sub> | 2.35(m)   | 36.2  |      |
|    |                        | $\delta$ CO               |           | 183.9 |      |
|    |                        | COO(H)                    |           | 177.4 |      |
| 19 | Glutathione (GSH)      | Glu $\alpha$              | 3.78(t)   | 56.8  | C    |
|    |                        | Glu $\beta$               | 2.16(m)   | 29.2  |      |
|    |                        | Glu $\gamma$              | 2.56(m)   | 34.1  |      |
|    |                        | Cys $\alpha$              | 4.57(dd)  | 58.6  |      |
|    |                        | Cys $\beta$               | 2.94(m)   | 28.3  |      |
|    |                        | Gly $\alpha$              | b         | b     |      |
|    |                        | C=O                       |           | 174.5 |      |
|    |                        |                           |           | 177.2 |      |
| 20 | Glycerolphosphocholine | 1-CH <sub>2</sub>         | 3.60(dd)  | b     | C    |



|    |                                |                    |          |       |      |
|----|--------------------------------|--------------------|----------|-------|------|
|    | (GPC)                          | 2-CH               | 3.89(m)  | b     |      |
|    |                                | 3-CH <sub>2</sub>  | 3.72(dd) | b     |      |
|    |                                | α-CH <sub>2</sub>  | 4.32(t)  | b     |      |
|    |                                | β-CH <sub>2</sub>  | 3.68(t)  | b     |      |
|    |                                | N-CH <sub>3</sub>  | 3.23(s)  | 56.7  |      |
| 21 | Glycine (Gly)                  | α-CH <sub>2</sub>  | 3.56(s)  | 44.1  | C    |
|    |                                | COO(H)             |          | 175.1 |      |
| 22 | Guanosine                      | CH-ring            | 8.0(s)   | 140.9 | C    |
|    |                                | C1H-ribose         | 5.92(d)  | 91.7  |      |
|    |                                | C3H-ribose         | 4.41(dd) | 73.4  |      |
|    |                                | C4H-ribose         | 4.24(dt) | 88.21 |      |
|    |                                | C5H-ribose         | 3.84     | 64    |      |
| 23 | Histidine (His)                | C4H,ring           | 7.08(s)  | 119.8 | C, M |
|    |                                | C2H,ring           | 7.85(s)  | 137.0 |      |
|    |                                | COO(H)             |          | 176.8 |      |
| 24 | Inosine                        | CH-ring            | 8.35(s)  | 143.2 | C    |
|    |                                | CH-ring            | 8.24(s)  | 155.6 |      |
|    |                                | C1H-ribose         | 6.10(d)  | 91.2  |      |
|    |                                | C2H-ribose         | 4.78(dd) | 76.65 |      |
|    |                                | C3H-ribose         | 4.44(dd) | b     |      |
|    |                                | C4H-ribose         | 4.28(dt) | b     |      |
|    |                                | C5H-ribose         | 3.87(dd) | b     |      |
| 25 | Inosine-5'-monophosphate (IMP) | CH-ring            | 8.59(s)  | 142.5 | C    |
|    |                                | CH-ring            | 8.24(s)  | 149.1 |      |
|    |                                | C1H-ribose         | 6.15(d)  | 89.9  |      |
|    |                                | C2H-ribose         | 4.77     | 77.1  |      |
|    |                                | C3H-ribose         | 4.51(dd) | 73.2  |      |
|    |                                | C4H-ribose         | 4.37(dt) | 87.5  |      |
|    |                                | C5H-ribose         | 4.03(m)  | 66.2  |      |
| 26 | Isoleucine (Ile)               | α-CH               | 3.67(m)  | 62.3  | C, M |
|    |                                | β-CH               | 1.98(m)  | 38.6  |      |
|    |                                | γ-CH               | 1.27(m)  | 27.8  |      |
|    |                                | γ'-CH              | 1.47(m)  |       |      |
|    |                                | δ-CH <sub>3</sub>  | 0.94(t)  | 13.9  |      |
|    |                                | 3- CH <sub>3</sub> | 1.01(d)  | 17.3  |      |
|    |                                | COO(H)             |          | 176.4 |      |
| 27 | Lactate                        | α-CH               | 4.11(q)  | 71.2  | C, M |
|    |                                | β-CH <sub>3</sub>  | 1.33(d)  | 22.7  |      |
|    |                                | COO <sup>-</sup>   |          | 185.2 |      |
| 28 | Leucine (Leu)                  | α-CH               | 3.73(t)  | 56.0  | C, M |
|    |                                | β-CH <sub>2</sub>  | 1.72(m)  | 42.6  |      |

|    |                                          |                             |           |       |      |
|----|------------------------------------------|-----------------------------|-----------|-------|------|
|    |                                          | $\gamma$ -CH                | 1.69(m)   | 26.8  |      |
|    |                                          | $\delta$ -CH <sub>3</sub>   | 0.97(d)   | 24.7  |      |
|    |                                          | $\delta'$ -CH <sub>3</sub>  | 0.96(d)   | 23.7  |      |
|    |                                          | COO(H)                      |           | 177.3 |      |
| 29 | Lysine (Lys)                             | $\alpha$ -CH                | 3.74(t)   | 56.0  | C, M |
|    |                                          | $\beta$ -CH <sub>2</sub>    | 1.90(m)   | 32.1  |      |
|    |                                          | $\gamma$ -CH <sub>2</sub>   | 1.46(m)   | 24.3  |      |
|    |                                          | $\delta$ -CH <sub>2</sub>   | 1.72(m)   | 29.3  |      |
|    |                                          | $\epsilon$ -CH <sub>2</sub> | 3.01(t)   | 41.6  |      |
|    |                                          | COO(H)                      |           | 177.3 |      |
| 30 | Methanol                                 | CH <sub>3</sub>             | 3.36(s)   | 51.6  | C, M |
| 31 | Monomethyl phosphate                     | CH <sub>3</sub>             | 3.47(d)   | 54.2  | C    |
| 32 | <i>myo</i> -Inositol                     | C1,3H                       | 3.54(dd)  | 73.31 | C    |
|    |                                          | C2H                         | 4.06(t)   | 73.1  |      |
|    |                                          | C5H                         | 3.26(t)   | 75.23 |      |
|    |                                          | C4,6H                       | 3.62(t)   | 72.01 |      |
| 33 | <i>N</i> -acetyl-glucosamine<br>(GlcNAc) | $\alpha$ -C1H               | 5.21(d)   | 93.66 | C    |
|    |                                          | $\alpha$ -C2,5,6H           | 3.85 (m)  |       |      |
|    |                                          | $\alpha$ -C3H               | 3.76      | 73.46 |      |
|    |                                          | $\alpha$ -C4H               | 3.46      | 72.72 |      |
|    |                                          | $\beta$ -C1H                | 4.71      | 97.78 |      |
|    |                                          | $\beta$ -C2H                | 3.67      | 59.51 |      |
|    |                                          | $\beta$ -C3H                | 3.53      | 76.73 |      |
|    |                                          | $\beta$ -C4,5H              | 3.46      | 72.72 |      |
|    |                                          | NA-H                        | 2.05 (s)  | 24.75 |      |
| 34 | NAD                                      | N5ring                      | 8.20(m)   | 131.2 | C    |
|    |                                          | N4ring                      | 8.83(d)   | 148.7 |      |
|    |                                          | N2ring                      | 9.34(s)   | 142.9 |      |
|    |                                          | N6ring                      | 9.15(d)   | 145.2 |      |
|    |                                          | A2Hring                     | 8.18(s)   | 155.6 |      |
|    |                                          | A8H ring                    | 8.43(s)   | 142.5 |      |
|    |                                          | N1'H                        | 6.09(d)   | 102.8 |      |
|    |                                          | N2'H                        | 4.48      | 80.4  |      |
|    |                                          | N5'H2                       | 4.23/4.36 | 67.6  |      |
|    |                                          | N3'H                        | 4.427     | 73.3  |      |
|    |                                          | N4'H                        | 4.546     | 89.7  |      |
|    |                                          | A1'H                        | 6.04(d)   | 89.4  |      |
|    |                                          | A2'H                        | 4.37      | 86.5  |      |
|    |                                          | A5'H2                       | 4.21/4.24 | 68.0  |      |
|    |                                          | A3'H                        | 4.51      | 73.17 |      |
|    |                                          | A4'H                        | 4.77      | 76.7  |      |

|                          |                      |                           |                       |                           |      |
|--------------------------|----------------------|---------------------------|-----------------------|---------------------------|------|
| 35                       | Niacinamide          | 2-CH                      | 8.94(dd)              | b                         | M    |
|                          |                      | 4-CH                      | 8.25(d)               | b                         |      |
|                          |                      | 5-CH                      | 7.60(dd)              | b                         |      |
|                          |                      | 6-CH                      | 8.71(d)               | b                         |      |
| 36                       | Phenylalanine (Phe)  | $\alpha$ -CH              | 3.99(dd)              | 58.8                      | C, M |
|                          |                      | $\beta$ -CH               | 3.13(dd)              | 38.9                      |      |
|                          |                      | $\beta^1$ -CH             | 3.27(dd)              | 38.9                      |      |
|                          |                      | C1,ring                   |                       | 137.9                     |      |
|                          |                      | C2,6,ring                 | 7.33(m)               | 132.0                     |      |
|                          |                      | C3,5,ring                 | 7.42(m)               | 131.5                     |      |
|                          |                      | C4,ring                   | 7.38(m)               | 130.5                     |      |
|                          |                      | COO(H)                    |                       | 176.7                     |      |
|                          |                      | 37                        | Phosphocholine (PCho) | $\alpha$ -CH <sub>2</sub> |      |
| $\beta$ -CH <sub>2</sub> | 4.17(m)              |                           |                       | 69.5                      |      |
| N-CH <sub>3</sub>        | 3.22(s)              |                           |                       | 56.7                      |      |
| 38                       | Pyroglutamate        | 5-CH                      | 4.18                  | 61.6                      | M    |
|                          |                      | 4-CH <sub>2</sub>         | 2.51/2.04(m)          | 28.4                      |      |
|                          |                      | 3-CH <sub>2</sub>         | 2.41(m)               | 32.6                      |      |
|                          |                      | COOH                      |                       | 183.5                     |      |
|                          |                      | C=O                       |                       | 184.6                     |      |
| 39                       | Pyruvate             | $\beta$ -CH <sub>3</sub>  | 2.38(s)               | b                         | M    |
| 40                       | Succinate            | CH <sub>2</sub>           | 2.40(s)               | 35.9                      | C, M |
|                          |                      | COO <sup>-</sup>          |                       | 183.6                     |      |
| 41                       | Taurine              | N-CH <sub>2</sub>         | 3.27(t)               | 50.3                      | C    |
|                          |                      | S-CH <sub>2</sub>         | 3.42(t)               | 38.2                      |      |
| 42                       | Threonine (Thr)      | $\alpha$ -CH              | 3.59(d)               | 63.0                      | C, M |
|                          |                      | $\beta$ -CH <sub>2</sub>  | 4.25(m)               | 68.6                      |      |
|                          |                      | $\gamma$ -CH <sub>3</sub> | 1.33(d)               | 20.8                      |      |
|                          |                      | COO(H)                    |                       | 175.4                     |      |
| 43                       | Trimethylamine (TMA) | CH <sub>3</sub>           | 2.88(s)               | 47.5                      | C    |
| 44                       | Tryptophan (Trp)     | C4H,ring                  | 7.74(d)               | b                         | C    |
|                          |                      | C5H,ring                  | 7.20(t)               | b                         |      |
|                          |                      | C6H,ring                  | 7.29(t)               | b                         |      |
|                          |                      | C7H,ring                  | 7.54(d)               | 114.8                     |      |
| 45                       | Tyrosine (Tyr)       | C3,5H,ring                | 6.90(d)               | 118.6                     | C, M |
|                          |                      | C2,6H,ring                | 7.19(d)               | 133.3                     |      |
|                          |                      | C1,ring                   |                       | 129.5                     |      |
|                          |                      | $\alpha$ -CH              | 3.94(dd)              | 58.9                      |      |
|                          |                      | $\beta$ -CH <sub>2</sub>  | 3.06                  | 39.0                      |      |
|                          |                      | C4,ring                   |                       | 157.7                     |      |
|                          |                      | COO(H)                    |                       | 177.1                     |      |

|        |                                                     |               |              |           |   |
|--------|-----------------------------------------------------|---------------|--------------|-----------|---|
| 46     | UDP-glucose (UDP-Glc)                               | G1-H          | 5.61         | 98.65     | C |
|        |                                                     | C6,ring       | 7.96(d)      | 144.4     |   |
|        |                                                     | C5,ring       | 5.98(d)      | 105.4     |   |
|        |                                                     | C1'H,ribose   | 5.99(d)      | 91.3      |   |
|        |                                                     | C2'3'H,ribose | 4.38(m)      | 72.2/76.5 |   |
|        |                                                     | C4',ribose    | 4.29(m)      | 85.9      |   |
|        |                                                     | C5'H,ribose   | 4.26/4.21(m) | 67.8      |   |
|        |                                                     | G2-H          | 3.90         | 73.1      |   |
|        |                                                     | G6-H          | 3.86/3.78    | 63.36     |   |
|        |                                                     | G3-H          | 3.77         | 74.7      |   |
|        |                                                     | G4-H          | 3.54         | 74        |   |
|        |                                                     | G5-H          | 3.47         | 72        |   |
| 47     | UDP-glucuronate (UDP-GlcA)                          | C6,ring       | 7.95(d)      | 144.5     | C |
|        |                                                     | C1'H,ribose   | 6.00(d)      | 91.4      |   |
|        |                                                     | C5,ring       | 5.98(d)      | 105.4     |   |
|        |                                                     | G1-H          | 5.62         | 98.1      |   |
|        |                                                     | C2'3'H,ribose | 4.38(m)      | 86.6      |   |
|        |                                                     | C4'H,ribose   | 4.29(m)      | 86.1      |   |
|        |                                                     | C5'H,ribose   | 4.25/4.19    | 67.8      |   |
|        |                                                     | G5-H          | 4.14(dd)     | 75.6      |   |
|        |                                                     | G2-H          | 3.79(dd)     |           |   |
|        |                                                     | G4-H          | 3.59(m)      | 63.2      |   |
| 48     | UDP- <i>N</i> -acetyl glucosamine<br>(UDP-GlcNAc)   | C6,ring       | 7.96(d)      | 144.1     | C |
|        |                                                     | C1'H,ribose   | 5.98(d)      | 91.1      |   |
|        |                                                     | C5,ring       | 5.97(d)      | 105.4     |   |
|        |                                                     | C2'3'H,ribose | 4.37(m)      | 72.2/76.5 |   |
|        |                                                     | C5'H,ribose   | 4.25/4.19(m) | 67.8      |   |
|        |                                                     | C4'H,ribose   | 4.29(m)      | 86.0      |   |
|        |                                                     | C2,ring       |              | 156.6     |   |
|        |                                                     | G1-H          | 5.52(dd)     | 97.3      |   |
|        |                                                     | G2-H          | 3.99(m)      | 56.5      |   |
|        |                                                     | G3-H          | 3.82(m)      | 73.6      |   |
|        |                                                     | G4-H          | 3.55(dd)     | 72.2      |   |
|        |                                                     | G5-H          | 3.93         | 75.8      |   |
|        |                                                     | G6-H          | 3.87         | 63.2      |   |
|        |                                                     | NA-H          | 2.08(s)      | 24.9      |   |
| NA-C=O |                                                     | 177.4         |              |           |   |
| 49     | UDP- <i>N</i> -Acetyl Galactosamine<br>(UDP-GalNAc) | G1-H          | 5.55(dd)     | 97.4      | C |
|        |                                                     | G2-H          | 4.05(m)      | 71.2      |   |
|        |                                                     | G3-H          | 3.97(dd)     | 70.3      |   |

|    |                              |                            |                |       |      |
|----|------------------------------|----------------------------|----------------|-------|------|
|    |                              | G4-H                       | 3.76(m)        | 57.4  |      |
|    |                              | G5-H                       | 3.79           | 63.6  |      |
|    |                              | G6-H                       | 3.78           | 63.6  |      |
|    |                              | C2'3'H,ribose              | 4.37(m)        | 76.6  |      |
|    |                              | C4',ribose                 | 4.29(m)        | 85.9  |      |
|    |                              | C5'H,ribose                | 4.25/4.19(m)   | 67.8  |      |
|    |                              | NA-H                       | 2.089(s)       | 24.9  |      |
|    |                              | C1'H,ribose                | 5.99(d)        | 91.1  |      |
|    |                              | C5,ring                    | 5.97(d)        | 105.4 |      |
|    |                              | C6,ring                    | 7.96(d)        | 144.1 |      |
| 50 | Uracil                       | C5H                        | 5.80(d)        | b     | C, M |
|    |                              | C6H                        | 7.54(d)        | b     |      |
| 51 | Uridine                      | C6,ring                    | 7.87(d)        | 144.1 | C    |
|    |                              | C1'H,ribose                | 5.92(d)        | 92.0  |      |
|    |                              | C5,ring                    | 5.90(d)        | 105.1 |      |
|    |                              | C3'H,ribose                | 4.34(t)        | 72.2  |      |
|    |                              | C5'H,ribose                | 4.12(q)        | 66.2  |      |
|    |                              | C4'H,ribose                | 4.23(t)        | 86.0  |      |
|    |                              | C2,ring                    |                | 156.6 |      |
| 52 | Uridine 5'-diphosphate (UDP) | CH-ring                    | 7.99(d)        | b     | C    |
|    |                              | CH-ring                    | 5.97(d)        | b     |      |
|    |                              | C1H-ribose                 | 5.96(broad, s) | b     |      |
|    |                              | C3H-ribose                 | 4.43(t)        | b     |      |
|    |                              | C2H-ribose                 | 4.39(t)        | b     |      |
|    |                              | C4H-ribose                 | 4.27(m)        | b     |      |
|    |                              | C5H-ribose                 | 4.23(c)        | b     |      |
| 53 | Valine (Val)                 | $\alpha$ -CH               | 3.61(d)        | 63.1  | C, M |
|    |                              | $\beta$ -CH                | 2.28(m)        | 31.9  |      |
|    |                              | $\gamma$ -CH <sub>3</sub>  | 0.99(d)        | 19.5  |      |
|    |                              | $\gamma'$ -CH <sub>3</sub> | 1.04(d)        | 20.7  |      |
|    |                              | COO(H)                     |                | 176.8 |      |

<sup>#</sup>The assignment was accomplished with the assistance of a series of two dimensional NMR spectra including <sup>1</sup>H-<sup>1</sup>H COSY, <sup>1</sup>H-<sup>1</sup>H TOCSY, <sup>1</sup>H *J*-resolved, <sup>1</sup>H-<sup>13</sup>C HSQC and <sup>1</sup>H-<sup>13</sup>C HMBC; Small signals were confirmed by standard compounds as well.

<sup>a</sup>Multiplicity: singlet(s), doublet(d), triplet(t), quartet(q), doublet of doublets(dd), doublet of triplets (dt), multiplet(m)

<sup>b</sup>The signals or the multiplicities were not determined.

<sup>c</sup>C, cell extract; M, medium

**Table S2.** Coefficients of metabolites with significant difference between HepG2.2.15 cells and HepG2 cells.

| Key | Metabolite                                       | $\delta^1\text{H}$ (ppm) | OPLS-DA coefficient (r) |
|-----|--------------------------------------------------|--------------------------|-------------------------|
| 7   | Adenosine                                        | 6.086                    | -0.89                   |
| 8   | Adenosine 5'-diphosphate (ADP)                   | 8.542                    | +0.88                   |
| 9   | Adenosine 5'-monophosphate (AMP)                 | 8.626                    | +0.92                   |
| 11  | Aspartate (Asp)                                  | 2.802                    | -0.76                   |
| 12  | Choline                                          | 3.210                    | -0.89                   |
| 16  | Fumarate                                         | 6.522                    | +0.88                   |
| 19  | Reduced glutathione (GSH)                        | 4.570                    | -0.95                   |
| 22  | Guanosine                                        | 8.006                    | -0.79                   |
| 24  | Inosine                                          | 8.242                    | -0.87                   |
| 25  | Inosine 5'-monophosphate (IMP)                   | 8.590                    | +0.67                   |
| 27  | Lactate                                          | 1.330                    | -0.82                   |
| 33  | <i>N</i> -acetyl-glucosamine (GlcNAc)            | 5.206                    | +0.98                   |
| 37  | Phosphocholine (PCho)                            | 3.226                    | +0.98                   |
| 47  | UDP-glucuronate (UDP-GlcA)                       | 5.622                    | +0.92                   |
| 48  | UDP- <i>N</i> -acetyl galactosamine (UDP-GalNAc) | 5.558                    | +0.98                   |
| 49  | UDP- <i>N</i> -acetyl glucosamine (UDP-GlcNAc)   | 5.522                    | +0.98                   |
| 51  | Uridine                                          | 5.922                    | -0.98                   |
| 52  | Uridine 5'-diphosphate (UDP)                     | 7.998                    | +0.98                   |

Positive (+) and negative (-) signs indicate the level of metabolite is higher or lower in HepG2.2.15 compared with HepG2 cells. The cutoff value of  $|r|$  is 0.602,  $n = 10$ ,  $P < 0.05$ . The numbers of the metabolites are the same as Table S1.

**Table S3.** Comparative total fatty acid profiles in HepG2 cells and HepG2.2.15 cells.

| Fatty acid        | HepG2            | HepG2.2.15       | <i>P</i> value           |
|-------------------|------------------|------------------|--------------------------|
| C14:0             | 108.74 ± 8.03    | 217.73 ± 7.63    | 1.57 × 10 <sup>-4</sup>  |
| C16:0             | 1572.17 ± 110.28 | 1989.49 ± 80.65  | 1.57 × 10 <sup>-4</sup>  |
| C18:0             | 657.56 ± 44.71   | 878.19 ± 51.19   | 5.96 × 10 <sup>-9</sup>  |
| C20:0             | 6.52 ± 0.42      | 16.05 ± 0.81     | 1.49 × 10 <sup>-17</sup> |
| C22:0             | 8.27 ± 0.52      | 11.55 ± 0.46     | 1.27 × 10 <sup>-11</sup> |
| C24:0             | 7.15 ± 0.51      | 9.42 ± 0.37      | 1.57 × 10 <sup>-4</sup>  |
| <b>Total SFA</b>  | 2360.41 ± 161.88 | 3122.44 ± 124.65 | 6.66 × 10 <sup>-10</sup> |
| C16:1n7           | 373.47 ± 28.45   | 709.74 ± 43.36   | 1.57 × 10 <sup>-4</sup>  |
| C16:1n9           | 44.72 ± 7.89     | 184.54 ± 18.47   | 3.52 × 10 <sup>-11</sup> |
| C18:1n7           | 751.86 ± 70.75   | 920.67 ± 63.64   | 3.81 × 10 <sup>-4</sup>  |
| C18:1n9           | 1624.46 ± 114.12 | 2191.01 ± 97.68  | 5.57 × 10 <sup>-10</sup> |
| C20:1n7           | 46.42 ± 3.42     | 68.64 ± 2.83     | 1.57 × 10 <sup>-4</sup>  |
| C20:1n9           | 38.30 ± 2.44     | 76.61 ± 2.97     | 3.38 × 10 <sup>-17</sup> |
| C22:1n9           | 12.25 ± 0.82     | 15.76 ± 0.74     | 8.44 × 10 <sup>-9</sup>  |
| C24:1n9           | 9.57 ± 0.67      | 15.37 ± 0.76     | 1.57 × 10 <sup>-4</sup>  |
| <b>Total MUFA</b> | 2901.05 ± 215.98 | 4182.35 ± 181.20 | 1.57 × 10 <sup>-4</sup>  |
| C18:3n3           | 15.37 ± 0.92     | 10.58 ± 0.29     | 1.57 × 10 <sup>-4</sup>  |
| C20:3n3           | 3.69 ± 0.30      | 3.18 ± 0.24      | 6.18 × 10 <sup>-4</sup>  |
| C20:5n3           | 57.65 ± 3.93     | 97.71 ± 3.76     | 6.89 × 10 <sup>-15</sup> |
| C22:6n3           | 184.72 ± 13.68   | 252.73 ± 9.31    | 1.38 × 10 <sup>-10</sup> |
| <b>Total n3</b>   | 261.43 ± 18.68   | 364.20 ± 13.20   | 1.57 × 10 <sup>-4</sup>  |
| C18:2n6           | 212.81 ± 14.12   | 135.99 ± 4.43    | 5.87 × 10 <sup>-9</sup>  |
| C18:3n6           | 2.47 ± 0.21      | 7.58 ± 0.30      | 9.36 × 10 <sup>-20</sup> |
| C20:2n6           | 8.04 ± 0.59      | 3.21 ± 0.59      | 4.80 × 10 <sup>-3</sup>  |
| C20:3n6           | 39.14 ± 2.77     | 93.48 ± 3.09     | 1.57 × 10 <sup>-4</sup>  |
| C20:4n6           | 375.53 ± 27.24   | 443.85 ± 15.21   | 2.85 × 10 <sup>-4</sup>  |
| C22:2n6           | 4.86 ± 0.42      | 18.79 ± 0.67     | 1.24 × 10 <sup>-21</sup> |
| <b>Total n6</b>   | 642.85 ± 45.10   | 702.90 ± 22.31   | 0.007                    |
| C18:2n7           | 4.78 ± 0.92      | 72.53 ± 3.60     | 3.82 × 10 <sup>-14</sup> |
| C20:2n7           | 13.04 ± 0.89     | 47.84 ± 2.47     | 1.57 × 10 <sup>-4</sup>  |
| C20:3n7           | 9.64 ± 0.67      | 18.46 ± 0.80     | 1.57 × 10 <sup>-4</sup>  |
| C20:3n9           | 18.00 ± 1.27     | 280.03 ± 11.76   | 1.57 × 10 <sup>-4</sup>  |
| <b>Total PUFA</b> | 949.73 ± 67.15   | 1485.96 ± 50.95  | 1.57 × 10 <sup>-4</sup>  |
| <b>Total UFA</b>  | 3850.78 ± 282.83 | 5668.31 ± 230.68 | 1.57 × 10 <sup>-4</sup>  |
| <b>Total</b>      | 6211.19 ± 440.83 | 8790.75 ± 331.68 | 1.57 × 10 <sup>-4</sup>  |

Data are shown as mean ± s.d. (µg fatty acid/g cell), *n* = 10. The significance is tested using *t*-test if the distribution is normal, if not the Mann-Whitney Test is performed. SFA, saturated fatty acids; UFA, unsaturated fatty acids; MUFA, monounsaturated fatty acids; PUFA, polyunsaturated fatty acids.

**Table S5.** List of the primers used for quantitative RT-PCR

| Gene Name       | Primer sequence (F: forward; R: reverse, 5'-3')             |
|-----------------|-------------------------------------------------------------|
| <i>GCLM</i>     | F: GGCACAGGTAAAACCAAATAGTAAC<br>R: CAAATTGTTTAGCAAATGCAGTCA |
| <i>GSS</i>      | F: GCCCCTAGCCGGTTTGTGCT<br>R: CACTGGACCACTCGGGCAGG          |
| <i>GCLC</i>     | F: CTGTTGCAGGAAGGCATTGAT<br>R: TTCAAACAGTGTCAAGTGGGTCTCT    |
| <i>GFAT1</i>    | F: ATCTCTCTCGTGTGGACAGC<br>R: TGACGCGATTGGTGTGTTCTA         |
| <i>CHKA</i>     | F: TGGGCCAAAACCTATGGCA<br>R: ATGTAGCCATTTTCTCGGCG           |
| <i>CHPT1</i>    | F: GCTCGTGCTCATCTCCTACTG<br>R: CTTCTGGCTTGTTCCTCATCA        |
| <i>CEPT1</i>    | F: TGATGGGAAACAGGCAAGAAGA<br>R: AATCAGGGTTTGTCCCCAGC        |
| <i>PHOSPHO1</i> | F: CTCCAAACTCAGCCGGGACA<br>R: GTCGGTGCATTACCGTGAGC          |
| <i>PCYT1A</i>   | F: ATCATCACCCGAATTGTGCG<br>R: TTTGTCAACCCTCTCCTGCAA         |
| <i>ACTB</i>     | F: TGTGTTGGCGTACAGGTCTTTG<br>R: GGGAAATCGTGCGTGACATTAAG     |
| <i>HBV</i>      | F: GTTGCCCGTTTGTCTCTAATTC<br>R: GGAGGGATACATAGAGGTTTCCTT    |



## Supplementary Methods

### Metabolites assignment

The metabolite assignment was accomplished with the assistance of two dimensional NMR spectra including  $^1\text{H}$ - $^1\text{H}$  COSY,  $^1\text{H}$ - $^1\text{H}$  TOCSY,  $^1\text{H}$  *J*-resolved,  $^1\text{H}$ - $^{13}\text{C}$  HSQC and  $^1\text{H}$ - $^{13}\text{C}$  HMBC<sup>1</sup>, and HMDB database<sup>2</sup>. Some metabolites were also confirmed by standard compounds.

### Enzyme expression analysis

The levels of enzymes were detected using SILAC coupled with LC-MS/MS. The SILAC labeling, subcellular fractionation, and SCX-coupled RPLC-MS/MS were all carried out as described previously<sup>3</sup>. Tandem mass spectra were extracted by Analyst version 2.0. The raw MS spectra analysis was performed with ProteinPilot 4.0 (AB SCIEX, USA) using the Paragon algorithm<sup>4</sup>. The ipi\_HUMAN\_v3\_77 database was used. The data analysis parameters were as follows: Sample type: SILAC (Lys+8, Arg+10); Cys Alkylation: Iodoacetamide; Digestion: Trypsin; Instrument: QSTAR Elite ESI; Special Factors: Urea denaturation; Search Effort: Thorough ID; FDR Analysis: Yes; Detected Protein Threshold [Unused ProtScore (Conf)]: 1.3 (95.0%); the others are default parameters in the software.

Proteins with corrected assigned peptides (identified with Unused ProtScore greater than 1.3 for 95% confidence) were considered as identified. The false discovery rates of peptide-spectra matches determined by decoy database search were < 5%. Protein ratio *P*-value less than 0.05 indicated significant

change.

### **Fatty acids analysis**

The methylesterification of fatty acids was accomplished as described previously<sup>5</sup> with a little modification, namely the residue from 10 mg cell pellets aqueous extraction was dissolved in 1 mL methanol/hexane solution (4:1, v/v) containing 20 µL internal standard hexane solution (1 mg/mL heptadecanoate-methyl ester, 0.5 mg/mL tricosanoate-methyl ester and 2 mg/mL 2,6-di-tert-butyl-4-methyl phenol, Sigma-Aldrich, USA), then 100 µL acetylchloride was added in an ice bath after vigorous vortex. The reaction was kept for 24 h at room temperature in the dark. Then, 2 mL 6% K<sub>2</sub>CO<sub>3</sub> was added slowly to stop the reaction and neutralize the mixture. The solution was extracted 3 times with 200 µL hexane per time. All the supernatants were mixed together and evaporated until dry, then kept for GC analysis.

The prepared sample was redissolved with 20 µL hexane. The analysis was performed with a Shimadzu GC-MS 2010 plus chromatography system (Shimadzu Scientific Instruments, Japan) equipped with a flame ionization detector and a DB-225 column (cut to 10 m, 0.1 mm ID, 0.1 µm film thickness) (Agilent, USA). The injection volume was 1 µL and the split ratio was 60:1. The injection port and detector temperatures were 230 °C. The column temperature program was as follows: temperature was held at 55 °C for 0.5 min, increased to 205 °C at the speed of 30 °C/min, held at 205 °C for 3 min, increased to 230 °C at

5 °C /min, held at 230 °C for 2.5 min. The identification of fatty acids was made by comparison with standard fatty acid-methyl esters according to the retention time and also confirmed by MS analysis. The quantity of fatty acids was determined by the internal standard.

## **Plasmid transfection**

HBV 1.3-fold length plasmid (pHBV1.3, GenBank accession No. U95551, ayw)<sup>6</sup> was transfected into HepG2 cells by electroporation using the method recommended by Bio-Rad Laboratories ([www.bio-rad.com](http://www.bio-rad.com)).

## **Supplementary References**

1. Dai, H. *et al.* Combined NMR and LC-DAD-MS analysis reveals comprehensive metabonomic variations for three phenotypic cultivars of *salvia miltiorrhiza* bunge. *J Proteome Res* **9**, 1565-1578 (2010).
2. Wishart, D. S. *et al.* HMDB: a knowledgebase for the human metabolome. *Nucleic Acids Res* **37**, D603-D610 (2009).
3. Zhang, L.-K. *et al.* Identification of host proteins involved in Japanese encephalitis virus infection by quantitative proteomics analysis. *J Proteome Res* **12**, 2666-2678 (2013).
4. Shilov, I. V. *et al.* The paragon algorithm, a next generation search engine that uses sequence temperature values and feature probabilities to identify peptides from tandem mass spectra. *Mol Cell Proteomics* **6**, 1638-1655

(2007).

5. Xu, Z. *et al.* An improved method for determining medium- and long-chain FAMES using gas chromatography. *Lipids* **45**, 199-208 (2010).
6. Wu, C. C. *et al.* Amino Acid Substitutions at Positions 122 and 145 of Hepatitis B Virus Surface Antigen (HBsAg) Determine the Antigenicity and Immunogenicity of HBsAg and Influence In Vivo HBsAg Clearance. *J Virol* **86**, 4658-4669 (2012).
